# Supplementary material for: Constructing a photo-enzymatic cascade reaction and itsin situmonitoring: enzymes hierarchically trapped in titania meso-porous MOFs as a new photosynthesis platform
Source: Royal Society of Chemistry journal article supplement (doi:10.1039/d1ta04009j), 2021-01-01
Supplement: d1ta04009j1.pdf [file d1ta04009j1.pdf]

## Electronic Supplementary Information

### Constructing a Photo-Enzymatic Cascade Reaction and its *in situ* Monitoring: Enzymes Hierarchically Trapped in Titania Meso-Porous MOFs as a New Photosynthesis Platform

Junli Guo,<sup>a</sup> Lingling Yang,<sup>a</sup> Chenxi Zhao,<sup>a</sup> Zhida Gao,<sup>a</sup> Yan-Yan Song,<sup>\*a</sup> and Patrik Schmuki<sup>\*b</sup>

<sup>a</sup> College of Sciences, Northeastern University, Shenyang 110004, China

E-mail: yysong@mail.neu.edu.cn

<sup>b</sup> Department of Materials Science, WW4-LKO, University of Erlangen-Nuremberg, 91058 Erlangen, Germany.

E-mail: schmuki@ww.uni-erlangen.de

## 1. Chemicals and Reagents

Ti sheets (0.1 mm thickness, 99.6% purity) were purchased from Baosheng Hardware (Bao ji). 1,4-Dicarboxybenzene (BDC), 2-aminoterephthalic Acid (BDC-NH<sub>2</sub>), cytochrome C (CytC), and titanium isopropoxide were purchased from Aladdin. 3,3',5,5'-Tetramethylbenzidine (TMB), Acid orange 7 (AO7), N-(3-dimethylaminopropyl)-N'-ethyl-carbodiimide hydrochloride (EDC), and N-hydroxysuccinimide (NHS) were purchased from Sigma. Ammonium fluoride (NH<sub>4</sub>F), ethylene glycol, N,N-dimethylformamide (DMF, 99.8%), methanol (CH<sub>3</sub>OH), and other chemicals were purchased from Sinopharm Chemical Reagent and used as received without further purification. All aqueous solutions were prepared using Millipore Milli-Q water with a resistivity of 18.0 MΩ·cm.

## 2. Apparatus

UV-vis absorption spectra were recorded using a Perkin–Elmer spectrometer (Lambda 750S, USA). Morphology was characterized using a field-emission scanning electron microscope (Hitachi SU8000, Japan) and transmission electron microscope (TEM, JEM 2010, Japan). Crystal structures were identified by XRD acquired using an X'Pert XRD spectrometer (Philips, USA) using a CuKα X-ray source. FTIR spectroscopy was performed using a Nicolet 6700 instrument (Thermo Fisher, USA). N<sub>2</sub> adsorption–desorption isotherms were measured using a Micromeritics ASAP 2020 system. Prior to gas sorption measurements, 100 mg of as-formed samples was washed thoroughly with DMF and water to remove any remaining acetic acid, and then the sample was incubated in ethanol for 3 days, during which the solvent was decanted and freshly replenished three times every day. After that, the sample was dried under vacuum at 150 °C for 12 h to remove the remaining solvent, yielding a porous material. After ligand thermolysis, about 100 mg sample was treated under vacuum at 150 °C for 8 h before gas sorption experiment. In thermogravimetric analysis (TGA), 10 mg of the sample was heated using a TGA Q500 thermogravimetric analyzer from room temperature to 600 °C at a rate of 10 °C·min<sup>-1</sup> under air flow of 20 mL·min<sup>-1</sup>. A CHI660D electrochemical workstation (CH Instrument, USA) was used for all electrochemical tests equipped with two Ag/AgCl electrodes as the anode and cathode. Photocatalytic reactions were performed under the irradiation of a white LED (30 W, wavelength 400-600 nm).

## 3. Preparation of bulk R%-MIL-125-NH<sub>2</sub>

The synthesis of R%-MIL-125-NH<sub>2</sub> is based on a reported method.<sup>34,49</sup> Briefly, after BDC, BDC-NH<sub>2</sub>, and Ti(OiPr)<sub>4</sub> (1 mmol, 0.3 mL) were dissolved in 10 mL of a mixture of DMF and CH<sub>3</sub>OH (V<sub>DMF</sub>:V<sub>CH<sub>3</sub>OH</sub> = 9:1), it was sonicated for 15 min at room temperature and then transferred to a 50 mL Teflon-lined autoclave. The sealed vessel was then heated at 150 °C for 24 h to obtain R%-MIL-125-NH<sub>2</sub>. After cooling to room temperature, the synthesized product was washed with DMF and dried in a vacuum oven at room temperature.

## 4. Preparation of 30%-MIL-125-NH<sub>2</sub>(CytC)<sub>co</sub>/TiO<sub>2</sub>M

CytC was grafted to the surface through EDC/NHS activation: 1.0 mL of 20 mg/mL solution of EDC and 10 mg/mL solution of NHS were added with 1.0 mg of CytC for 60 min to activate carboxylic group on CytC. Then 30%-MIL-125-NH<sub>2</sub>/TiO<sub>2</sub>M with –NH<sub>2</sub> groups were immersed in this solution for 12 h at room temperature. After grafting the modified grating was washed by ultrapure water and dried at room temperature.

## 5. Measurement of photocatalysis-generated H<sub>2</sub>O<sub>2</sub>

UV-Vis spectra were used to detect H<sub>2</sub>O<sub>2</sub> produced by hpMIL-125/TiO<sub>2</sub>M and Au@hpMIL-125/TiO<sub>2</sub>M. Briefly, 3 mg Au@hpMIL-125/TiO<sub>2</sub>M was dipped in 1 mL H<sub>2</sub>O and then exposed to visible-light irradiation (30 W white LED light). After irradiation for a certain period, 1.5 mM ABTS and 0.1 mg/mL HRP were added. After incubating the solution at 37 °C for 20 min in dark, the absorption spectra of ABTS at 734 nm were recorded using a Perkin–Elmer spectrometer.

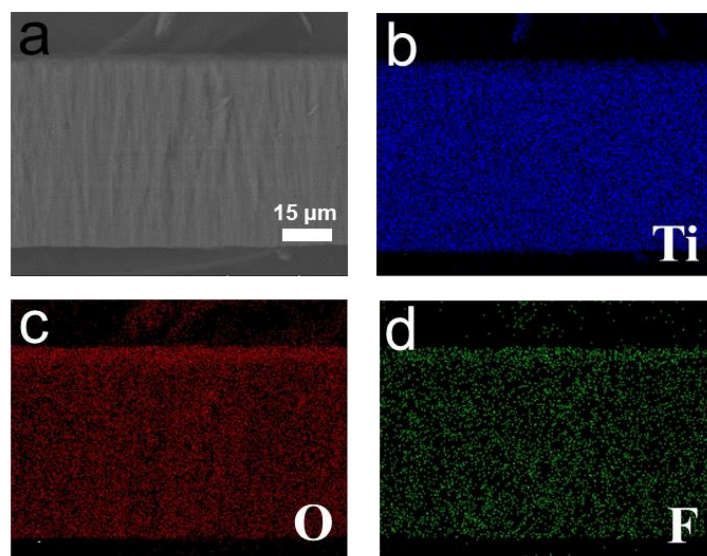

**Fig. S1** (a) SEM cross-sectional image of amorphous  $\text{TiO}_2\text{M}$ . EDS-SEM cross-sectional mapping for different elements of amorphous  $\text{TiO}_2\text{M}$ : (b) Ti, (c) O, (d) F.

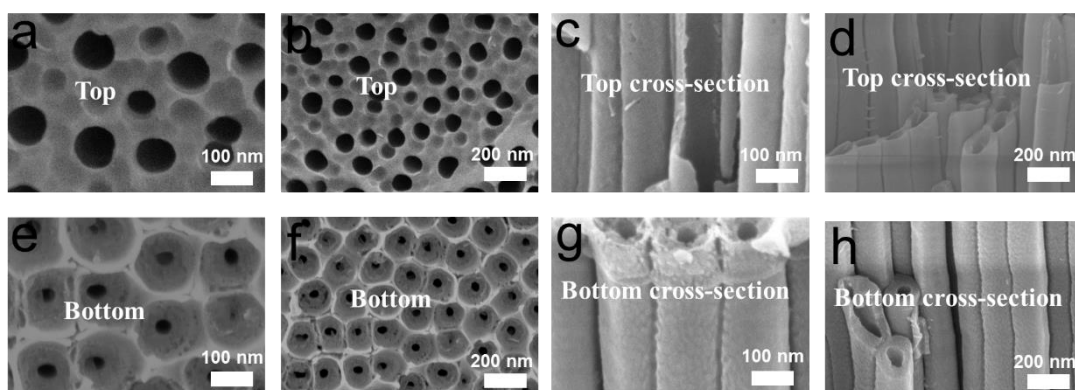

**Fig. S2** (a) SEM images of TiO<sub>2</sub>M treatment in a 50 mL Teflon-lined autoclave containing 200  $\mu$ L HCl (0.1 M), 9 mL DMF and 1mL CH<sub>3</sub>OH at 150  $^{\circ}$ C for 12 h ((a, b) top view, (c, d) top cross-section, (e, f) bottom view, (g, h) bottom cross-section).

In Fig. S2, the hydrothermal treatment in organic solution without ligands keeps the architecture of TiO<sub>2</sub> nanochannel wall. No crystallite can be found on the wall. Therefore, the plate-like nanocrystals observed in our experiment can be ascribed to the metal-organic framework formed by the coordination of the ligands (BDC or BDC-NH<sub>2</sub>) and Ti<sup>4+</sup>.

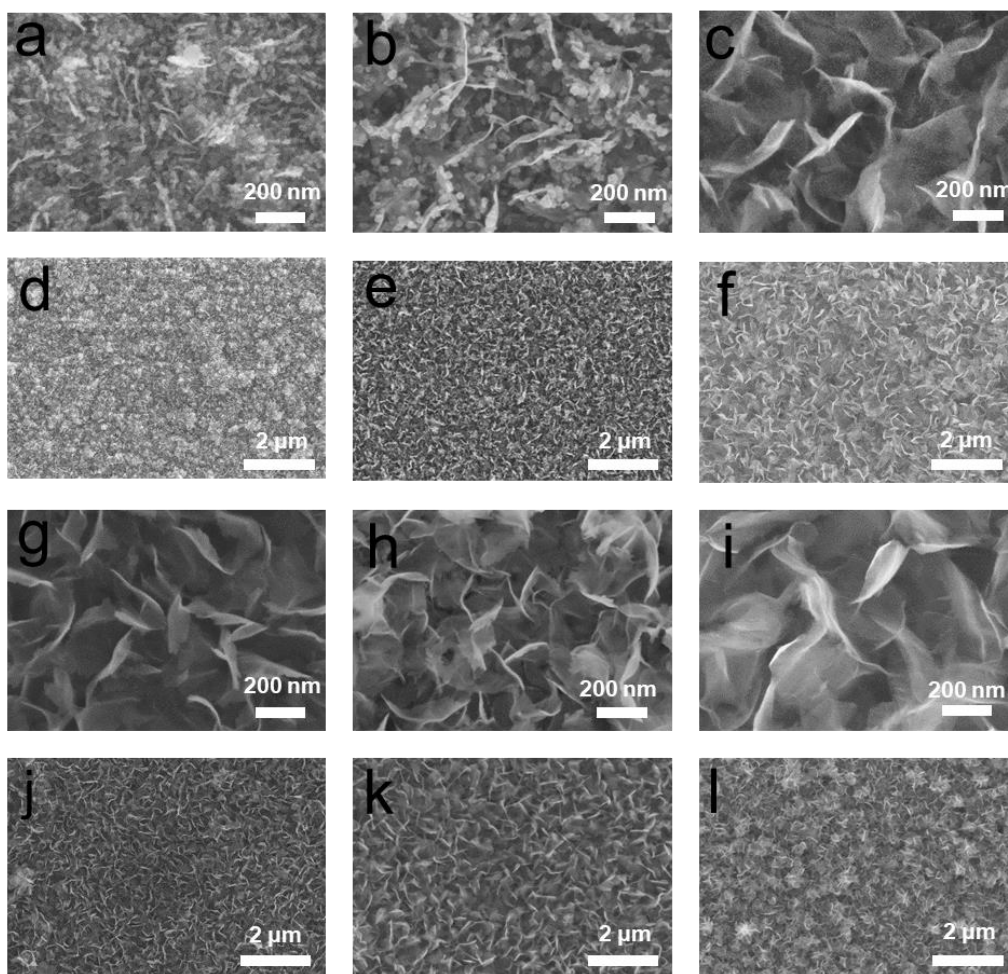

**Fig. S3** SEM images of (a, d) MIL-125/TiO<sub>2</sub>M, (b, e) 10%-MIL-125-NH<sub>2</sub>/TiO<sub>2</sub>M, (c, f) 20%-MIL-125-NH<sub>2</sub>/TiO<sub>2</sub>M, (g, j) 30%-MIL-125-NH<sub>2</sub>/TiO<sub>2</sub>M, (h, k) 40%-MIL-125-NH<sub>2</sub>/TiO<sub>2</sub>M, (i, l) 50%-MIL-125-NH<sub>2</sub>/TiO<sub>2</sub>M.

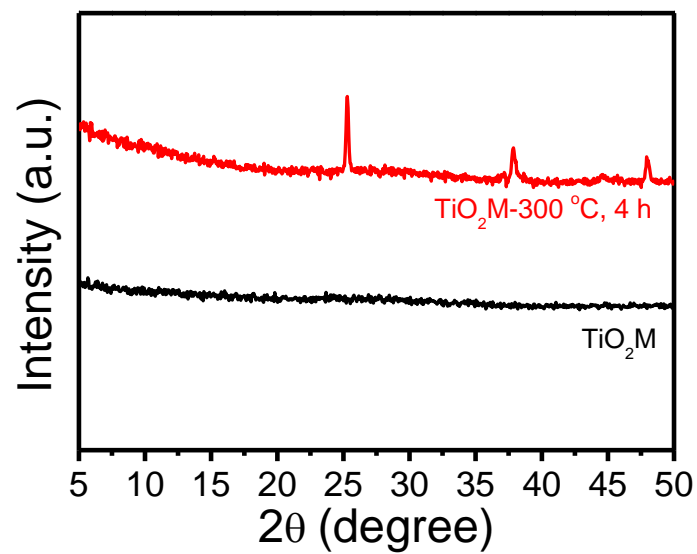

**Fig. S4** XRD patterns of TiO<sub>2</sub>M treatment in a 50 mL Teflon-lined autoclave containing 200 μL HCl (0.1 M), 9 mL DMF and 1mL CH<sub>3</sub>OH at 150 °C for 12 h (black line) and TiO<sub>2</sub>M annealed at 300 °C for 4 h (red line).

As demonstrated by XRD results, TiO<sub>2</sub>M is still amorphous (black line) after undergoing the hydrothermal treatment in the absence of ligands.

The annealing treatment at 300 °C for 4 h transfers the amorphous TiO<sub>2</sub> to anatase crystalline (red line).

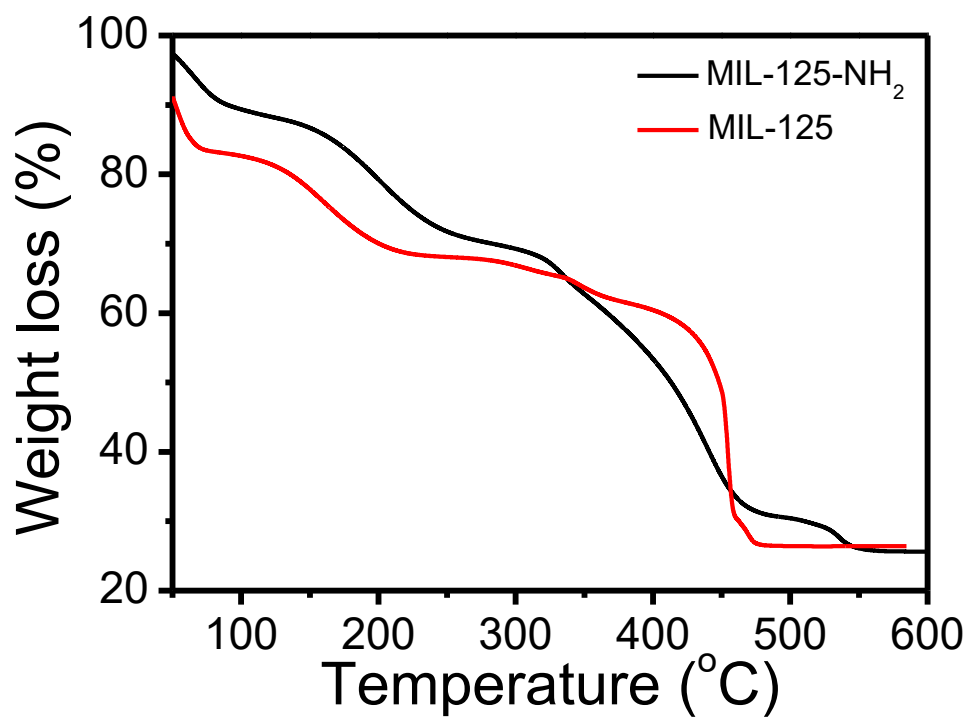

Fig. S5 Thermogravimetric analyses (TGA) of MIL-125 and MIL-125-NH<sub>2</sub>.

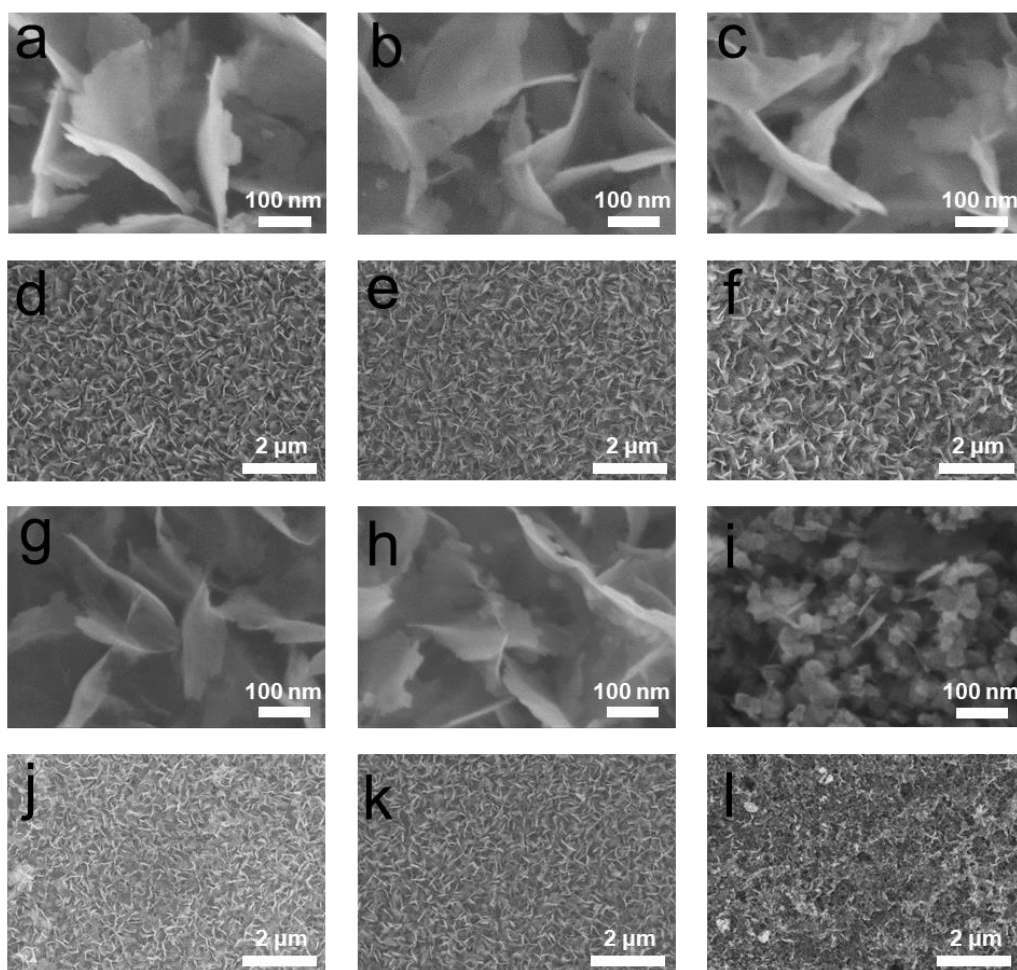

**Fig. S6** SEM of 30%-MIL-125-NH<sub>2</sub>/TiO<sub>2</sub>M annealed for (a, d) 0.5 h, (b, e) 1 h, (c, f) 2 h, (g, j) 4 h, (h, k) 6 h and (i, l) 8 h at 300 °C in air.

SEM images show that the plate-like MOFs on the membrane surface and on the channel walls maintain their typical structure after a 0.5-4 h thermolysis treatment (Fig. S6). However, a further increase in thermolysis time to 6 h (Fig. S6h, k) or 8 h (Fig. S6i, l), leads to a collapse of the MOF nanocrystals.



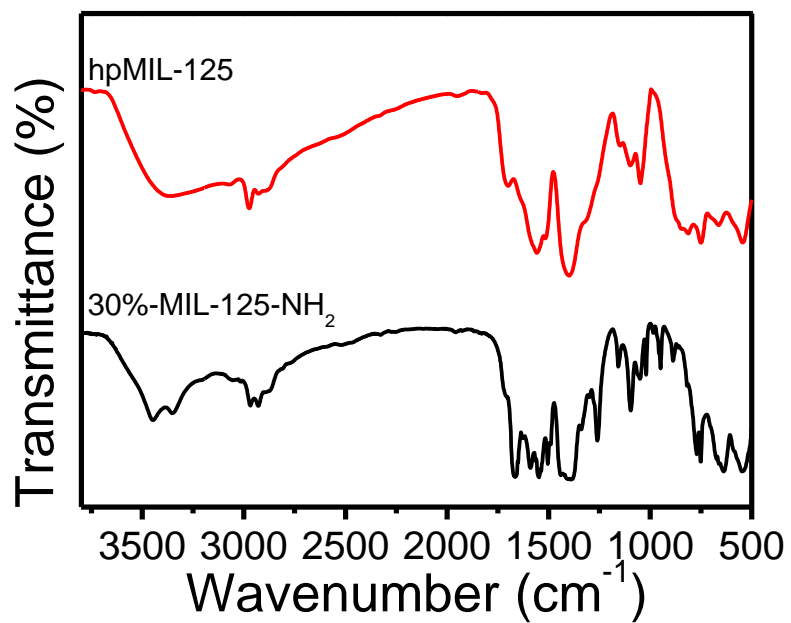

**Fig. S7** FTIR of 30%-MIL-125-NH<sub>2</sub> before and after annealing at 300 °C for 4 h in air.

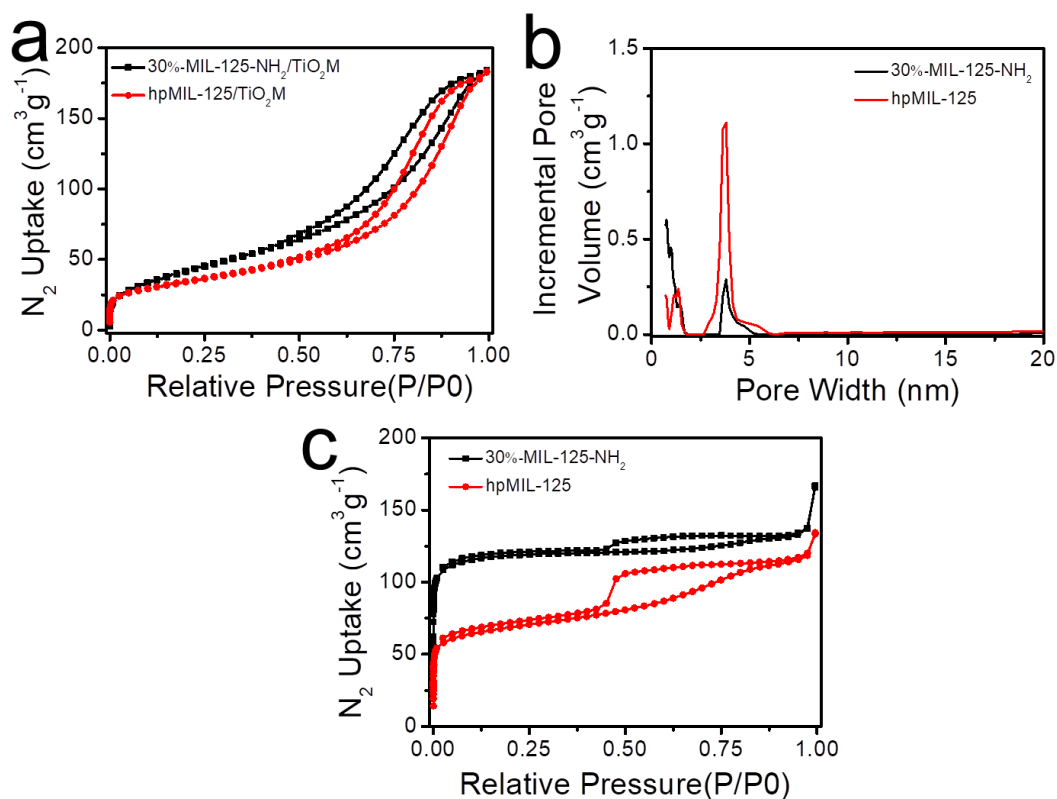

**Fig. S8** (a) N<sub>2</sub> sorption isotherms of 30%-MIL-125-NH<sub>2</sub>/TiO<sub>2</sub>M before and after linker thermolysis. (b) Pore size distributions of 30%-MIL-125-NH<sub>2</sub> before and after thermolysis treatment. (c) N<sub>2</sub> sorption isotherms of 30%-MIL-125-NH<sub>2</sub> before and after linker thermolysis.

Both 30%-MIL-125-NH<sub>2</sub> and hpMIL-125 (Fig. S8c) exhibit similar sorption isotherms containing a combination of type I and IV sorption curves. The high adsorption amount of N<sub>2</sub> occurring at a low relative pressure demonstrates the presence of micropores.<sup>1-3</sup> Meanwhile, the hysteresis at a relative pressure of ~0.5, associating with capillary condensation of N<sub>2</sub> within mesopores, demonstrates the presence of a mesostructure in 30%-MIL-125-NH<sub>2</sub> and hpMIL-125 samples.<sup>4,5</sup> The ratio of meso- to micropore volume on hpMIL-125 proportionally increases as indicated by the increased intensity at a pore size of ~4.5 nm (Fig. S8b). The mesopores in 30%-MIL-125-NH<sub>2</sub>/TiO<sub>2</sub>M can be explained by the presence of nonrigid aggregates of plate-like nanocrystals.<sup>6</sup> The specific surface area of 30%-MIL-125-NH<sub>2</sub> is 467 m<sup>2</sup> g<sup>-1</sup>, and it decreases to 255 m<sup>2</sup> g<sup>-1</sup> after the thermolysis treatment.

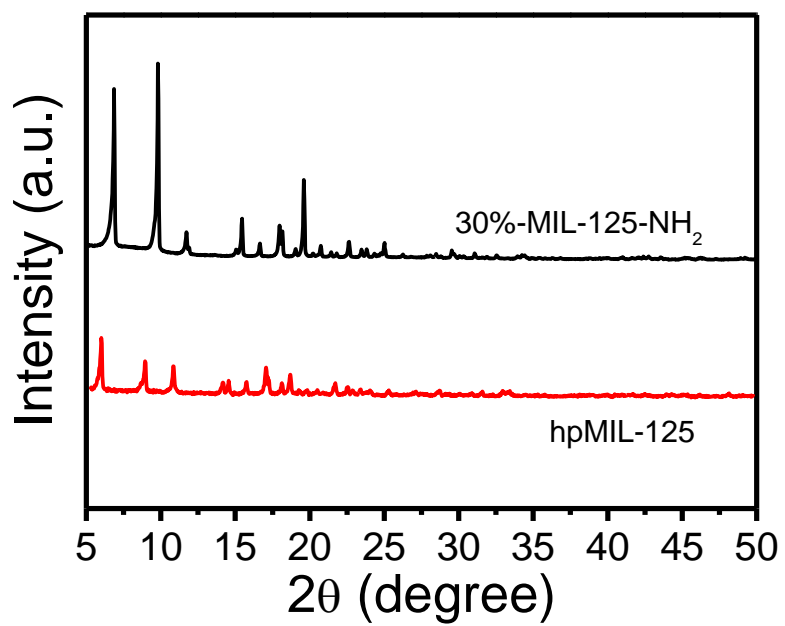

**Fig. S9** XRD patterns of 30%-MIL-125-NH<sub>2</sub> before and after annealing at 300 °C in air for 4 h.

**Table S1** Zeta potentials

| Sample                                          | Zeta potential (mV) |
|-------------------------------------------------|---------------------|
| TiO <sub>2</sub> M                              | -11.1               |
| 30%-MIL-125-NH <sub>2</sub> /TiO <sub>2</sub> M | -24.8               |
| hpMIL-125/TiO <sub>2</sub> M                    | -4.06               |
| Au@hpMIL-125/TiO <sub>2</sub> M                 | -28.6               |
| Au@hpMIL-125(CytC)/TiO <sub>2</sub> M           | -17.7               |

The as-formed TiO<sub>2</sub>M has a negative surface charge (zeta potential, -11.1 mV). Owing to the presence of carboxyl groups on BDC and BDC-NH<sub>2</sub>, the zeta potential negatively shifts to -24.8 mV by forming 30%-MIL-125-NH<sub>2</sub>/TiO<sub>2</sub>M. Upon the removal of MIL-125-NH<sub>2</sub> by thermolysis, the hpMIL-125/TiO<sub>2</sub>M provides fewer negative charges (zeta potential, -4.08 mV).

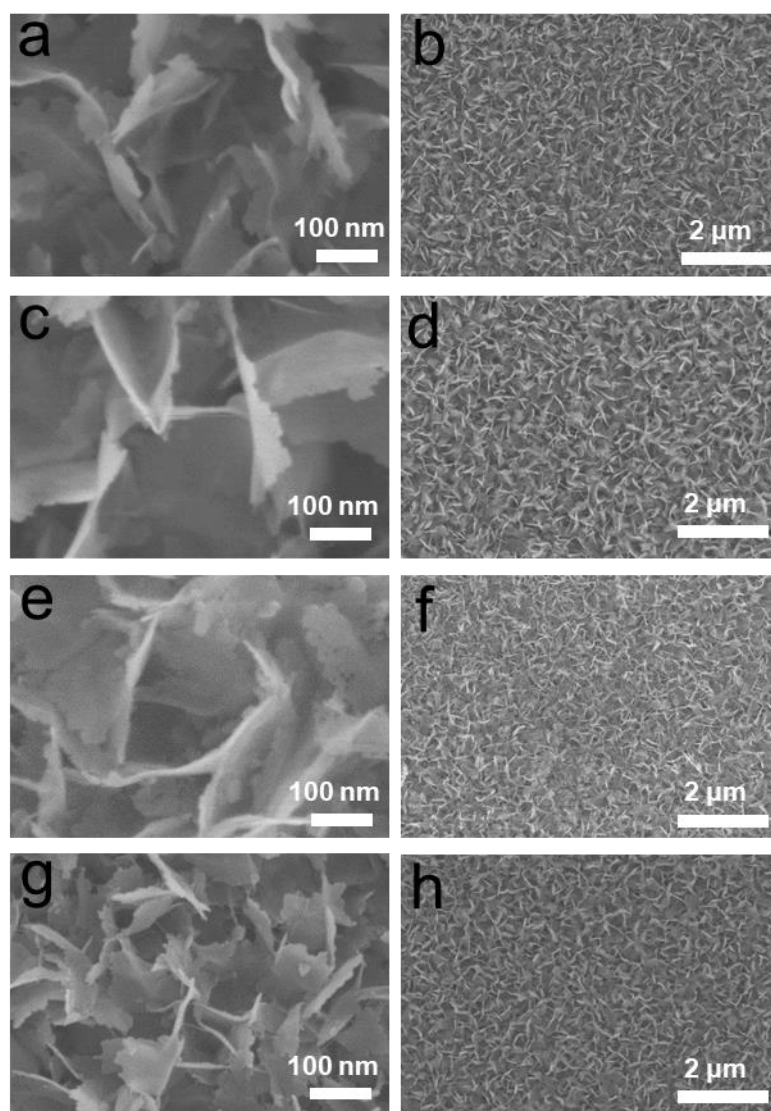

**Fig. S10** SEM of hpMIL-125/TiO<sub>2</sub>M soaked in water for different periods (a, b) 4 h, (c, d) 24 h, (e, f) 4 d, (g, h) 10 d.

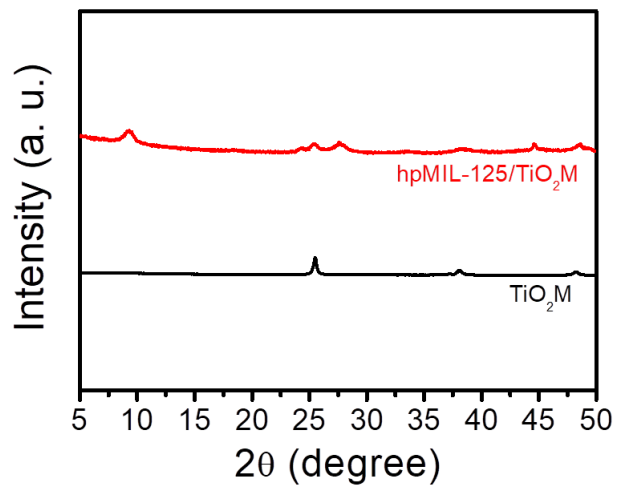

**Fig. S11** XRD patterns of anatase TiO<sub>2</sub>M (annealed at 300 °C for 4h) and as-proposed hpMIL-125/TiO<sub>2</sub>M after soaking in DI water at room temperature for 10 days.

Compared with the XRD patterns of freshly prepared anatase TiO<sub>2</sub>M (Fig. S4) and hpMIL-125/TiO<sub>2</sub>M (Fig. 1), it can be concluded that these membranes maintain their crystal structures after the long-time soaking in water.

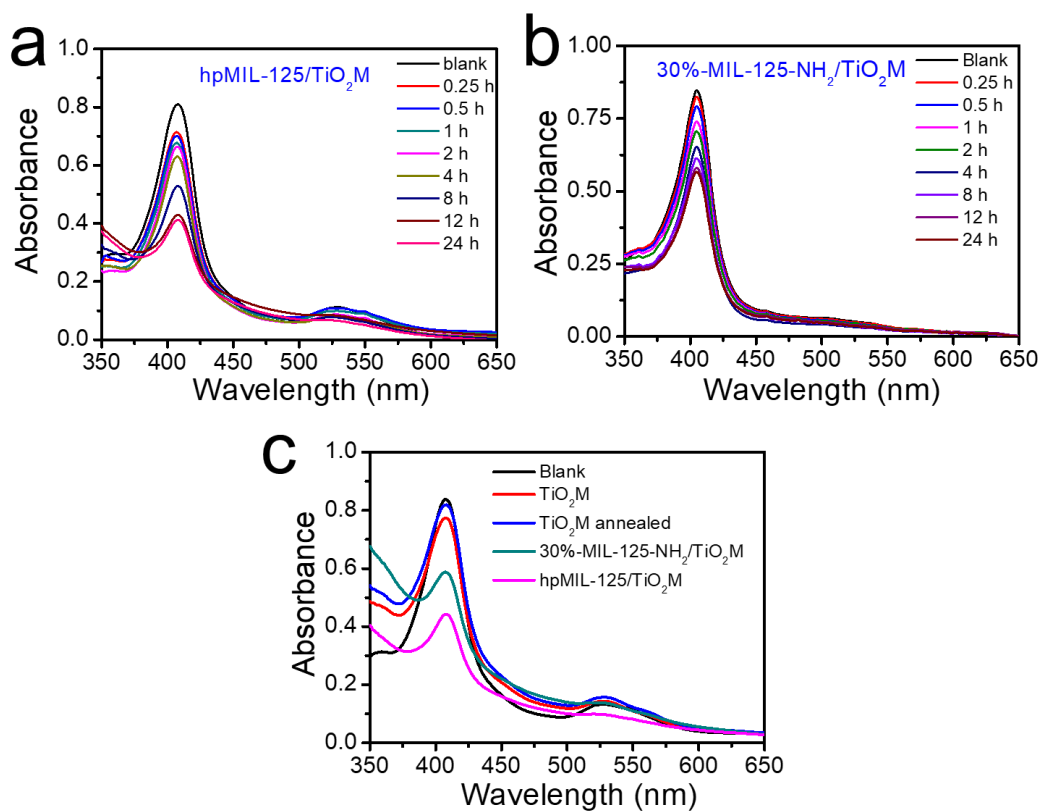

**Fig. S12** UV-Vis absorption spectra of CytC in the remaining solution after incubation treatment with 3 mg (a) hpMIL-125/TiO<sub>2</sub>M and (b) 30%-MIL-125-NH<sub>2</sub>/TiO<sub>2</sub>M in different time. (c) UV-Vis adsorption spectra of CytC in the remaining solution after incubation for 12 h with different samples.

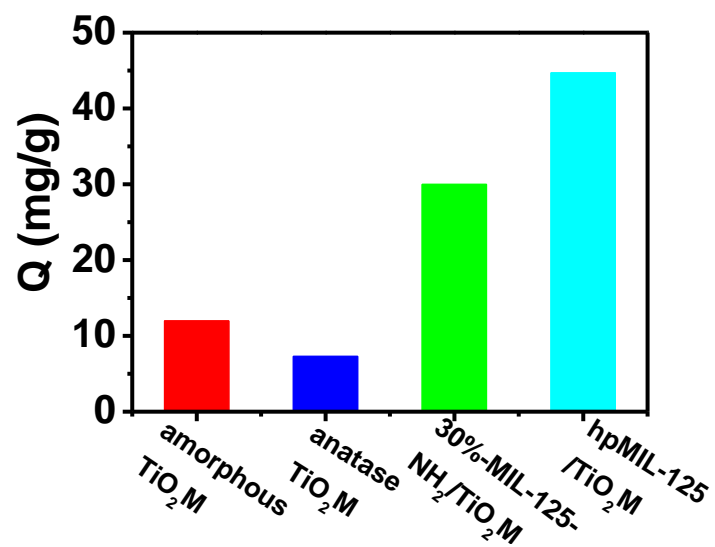

**Fig. S13** Adsorption capacity of CytC on amorphous TiO<sub>2</sub>M, anatase TiO<sub>2</sub>M, 30%-MIL-125-NH<sub>2</sub>/TiO<sub>2</sub>M, and hpMIL-125/TiO<sub>2</sub>M.



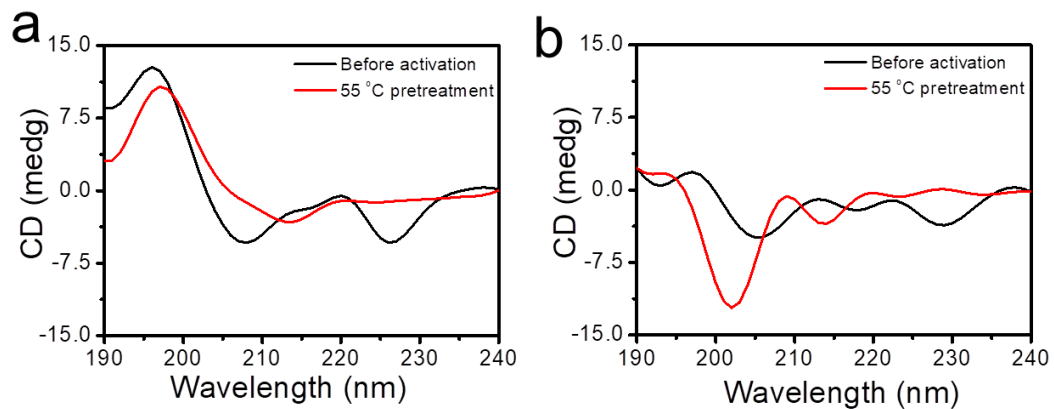

**Fig. S14** CD spectrum of a) 30%-MIL-125-NH<sub>2</sub>(CytC)/TiO<sub>2</sub>M and b) 30%-MIL-125-NH<sub>2</sub>(CytC)<sub>co</sub>/TiO<sub>2</sub>M before and after incubating at 55 °C for 2 h.

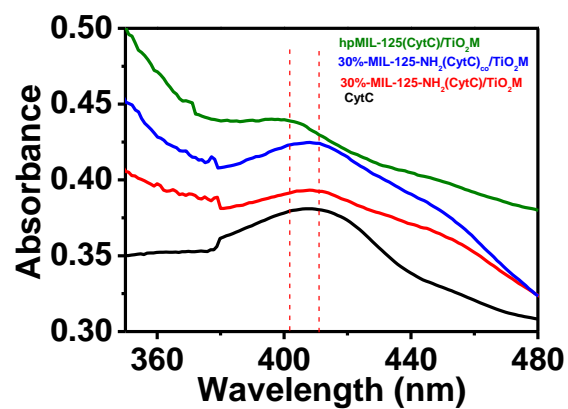

**Fig. S15.** UV-vis diffuse reflectance spectra of CytC (CytC mixed with BaSO<sub>4</sub> to press tablet), 30%-MIL-125-NH<sub>2</sub>(CytC)/TiO<sub>2</sub>M, 30%-MIL-125-NH<sub>2</sub>(CytC)<sub>co</sub>/TiO<sub>2</sub>M and hpMIL-125/TiO<sub>2</sub>M. A high-purity BaSO<sub>4</sub> was used as the background.

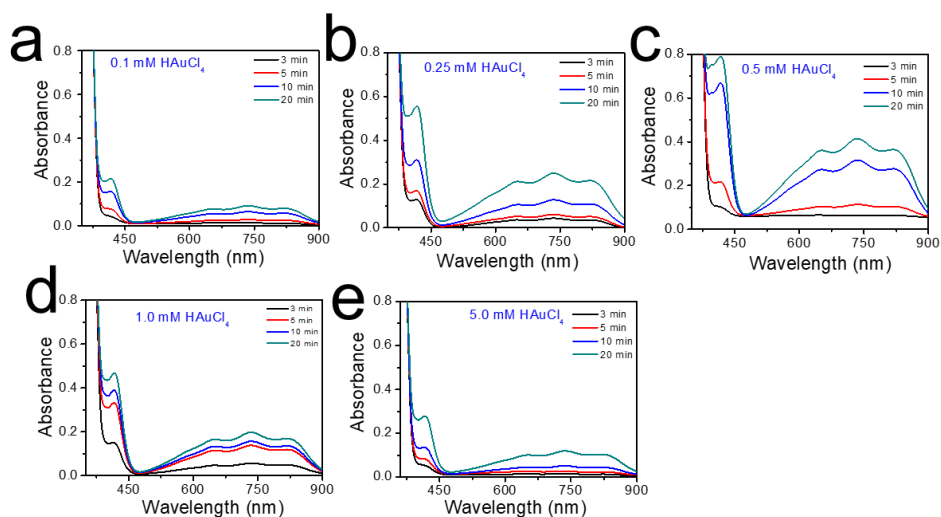

**Fig. S16** Effect of Au loading amount on  $\text{H}_2\text{O}_2$  generation. UV-Vis spectra of APTS in the presence of HRP and Au@hpMIL-125/TiO<sub>2</sub>M under irradiation for different time. The concentrations of HAuCl<sub>4</sub> are (a) 0.1 mM, (b) 0.25 mM, (c) 0.5 mM, (d) 1 mM, and (e) 5 mM.

The as-prepared Au@hpMIL-125/TiO<sub>2</sub>M (3 mg in 1 mL H<sub>2</sub>O) was irradiated with a 30 W white LED light in a quartz cuvette. After irradiation, 1.5 mM ABTS and 0.1 mg/mL HRP were added and then incubated at 37 °C for 20 min. The absorption spectra of ABTS at 734 nm were recorded using a spectrometer.

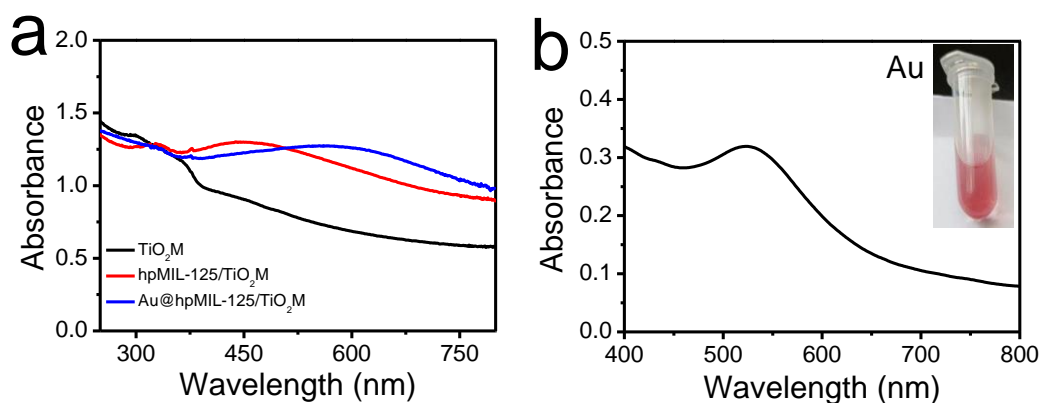

**Fig. S17** (a) UV/visible diffuse reflectance spectra of TiO<sub>2</sub>M, hpMIL-125/TiO<sub>2</sub>M, and Au@hpMIL-125/TiO<sub>2</sub>M. (b) UV-Vis absorption spectra of Au NPs peeled from Au@hpMIL-125/TiO<sub>2</sub>M. Inset image: the corresponding digital photographs of the Au NPs solution.

Figure S16 b shows the UV-Vis adsorption spectrum of Au NPs which are achieved by immersing the Au@hpMIL-125/TiO<sub>2</sub>M sample in a 5% HF solution at 60 °C for 2 h to resolve hpMIL-125/TiO<sub>2</sub>M. The UV-vis absorption spectrum (Fig. S16b) and digital image (inset of Fig. S16b) verify the typical SPR characters of the AuNPs on the sample.

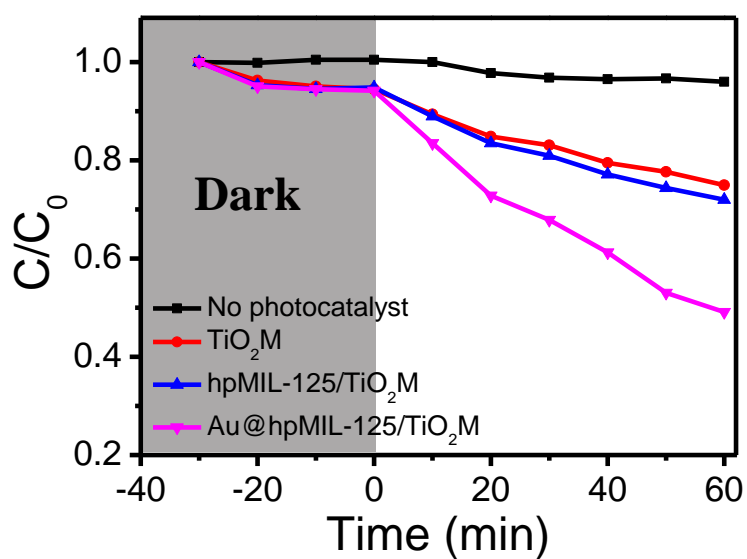

**Fig. S18** Photocatalytic degradation of AO7 in the presence of different photocatalysts. AO7: 25  $\mu$ M; light source: 30W LED (400-600 nm).

Owing to the wide band-gap of TiO<sub>2</sub> and ML-125, bare TiO<sub>2</sub>M and hpMIL-125/TiO<sub>2</sub>M samples only present poor photocatalytic activities in the visible-light irradiation (400-600 nm LED). After AuNPs grafting, the resulted Au@hpMIL-125/TiO<sub>2</sub>M sample shows an enhanced photocatalytic activity in the visible-light range. This improvement can be attributed to the SPR of AuNPs, by which the hot electrons generated by the excited SPR state are injected into the CB of TiO<sub>2</sub>.

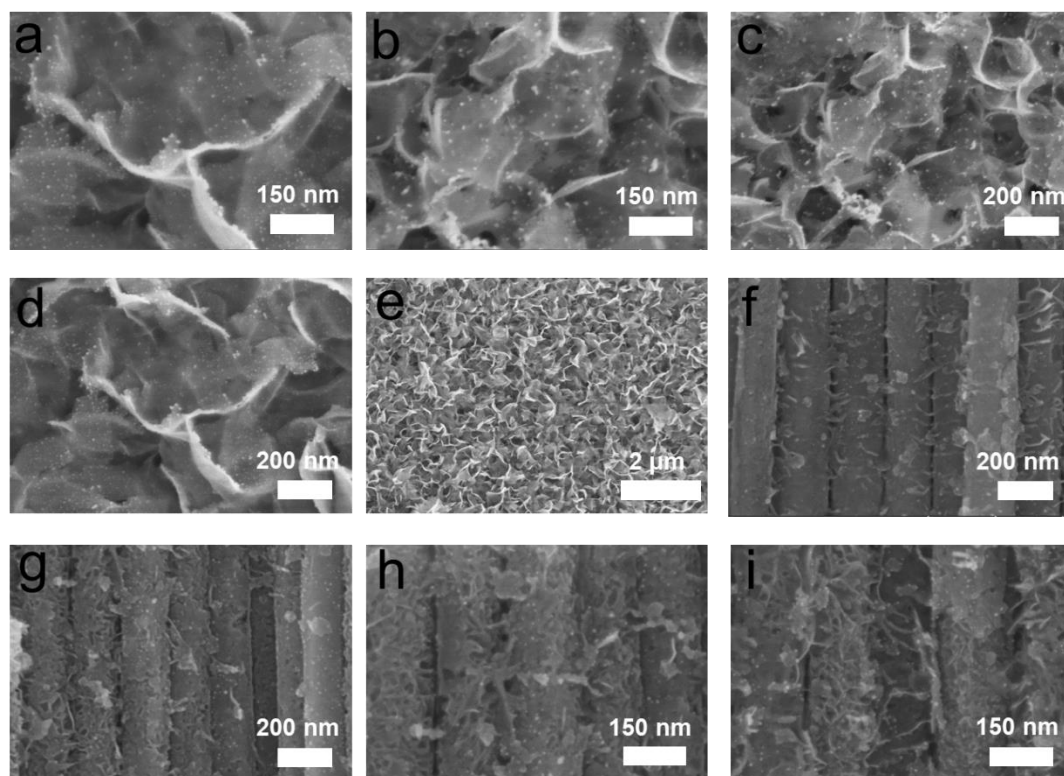

**Fig. S19** SEM images of Au NP-modified hpMIL-125/TiO<sub>2</sub>M.

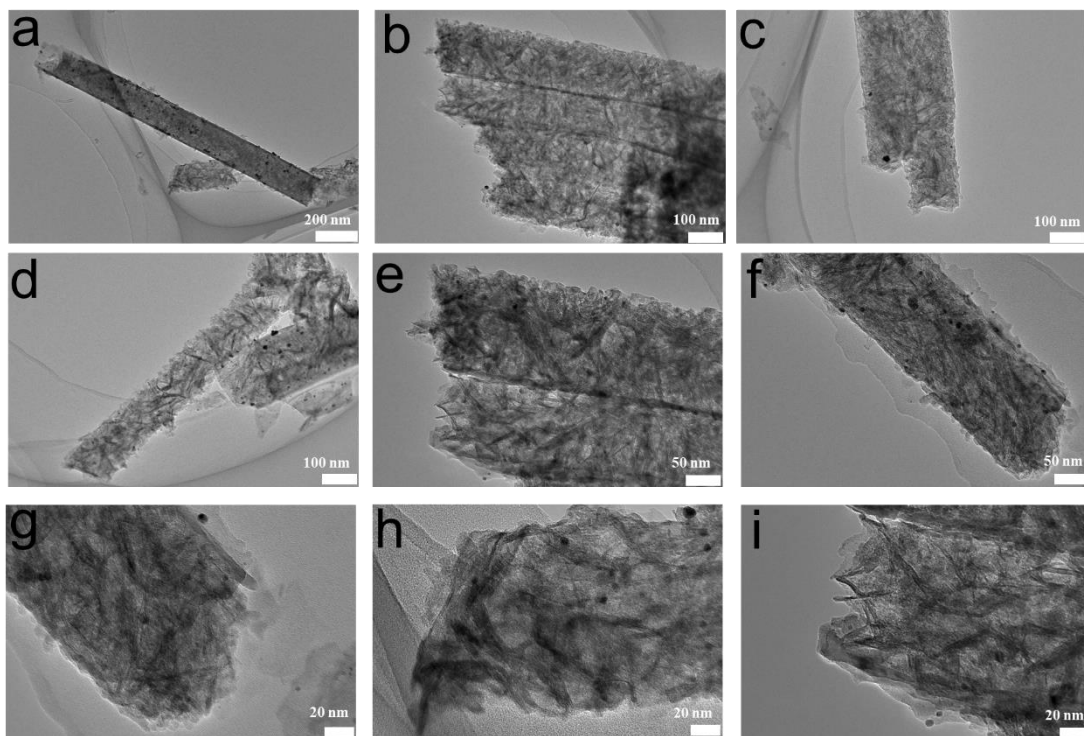

**Fig. S20** TEM images of Au NP-modified hpMIL-125/TiO<sub>2</sub>M.

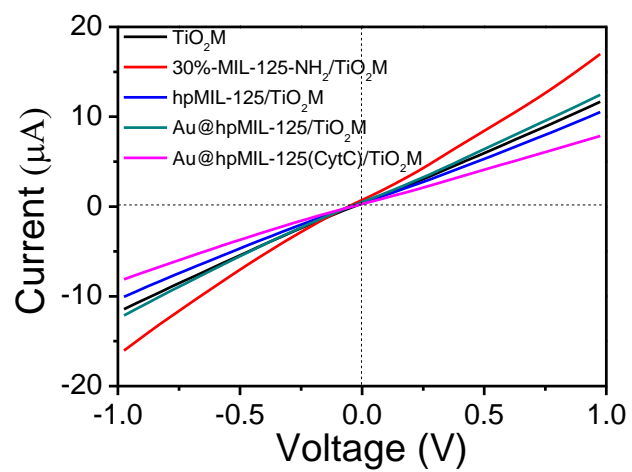

**Fig. S21** *I-V* properties of bare TiO<sub>2</sub>M (black line), 30%-MIL-125-NH<sub>2</sub> (red line), annealed at 300 °C for 4 h (blue line), modified with Au NPs (green line), and encapsulation of CytC (purple line).



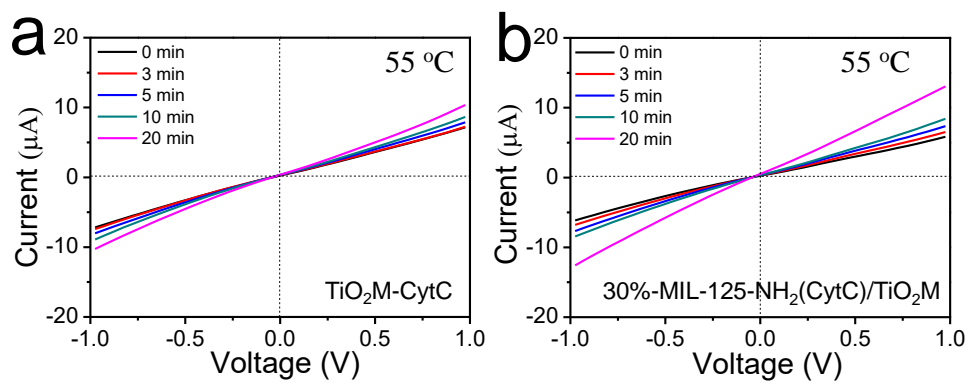

**Fig. S22** *I-V* properties of (a)  $\text{TiO}_2\text{M-CytC}$  and (b)  $30\text{-MIL-125-NH}_2(\text{CytC})/\text{TiO}_2\text{M}$  in 1.0 mM KCl after irradiating for different periods by LED.

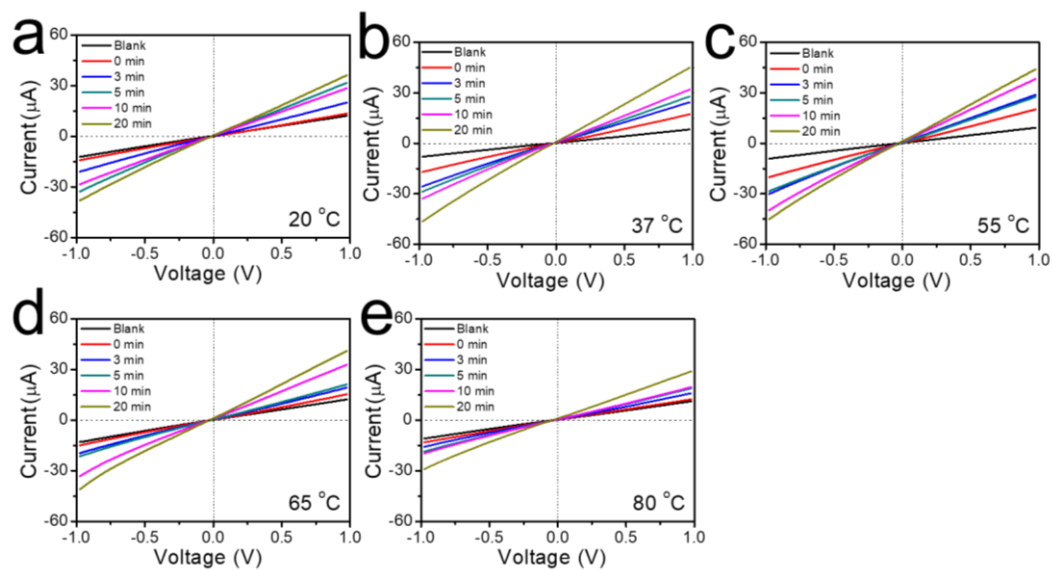

**Fig. S23** *I*-*V* properties of freshly prepared Au@hpMIL-125(CytC)/TiO<sub>2</sub>M samples with different irradiation time. Before the ionic current measurements, the samples were first pretreated at different temperatures for 2 h: (a) 20 °C, (b) 37 °C, (c) 55 °C, (d) 65 °C, (e) 80 °C.

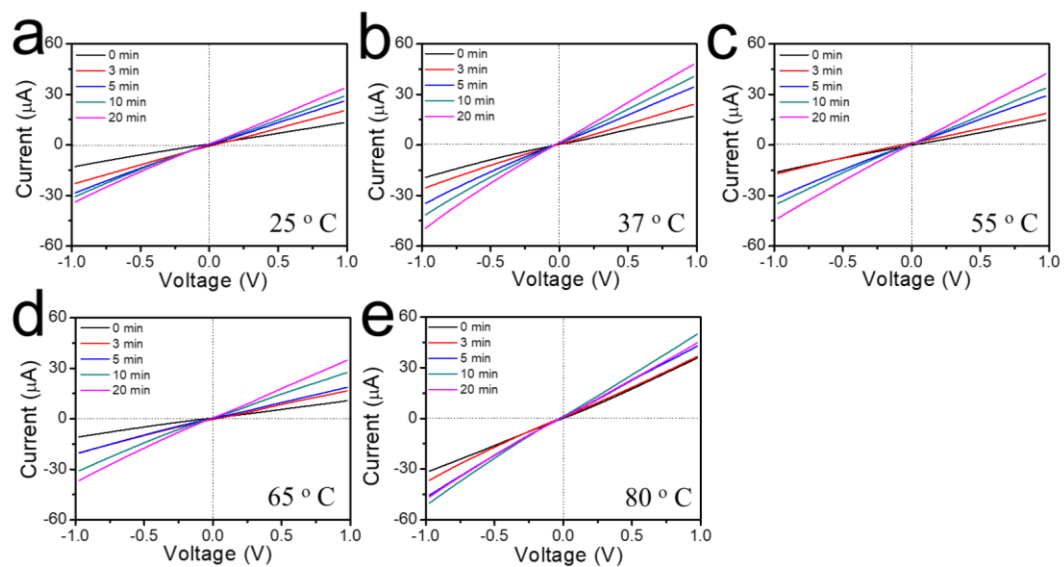

**Fig. S24** *I*-*V* properties of Au@hpMIL-125(CytC)/TiO<sub>2</sub>M samples with different irradiation time after storage for 7 days at room temperature. Before the ionic current measurements, the samples were first pretreated at different temperatures for 2 h: (a) 20 °C, (b) 37 °C, (c) 55 °C, (d) 65 °C, (e) 80 °C.

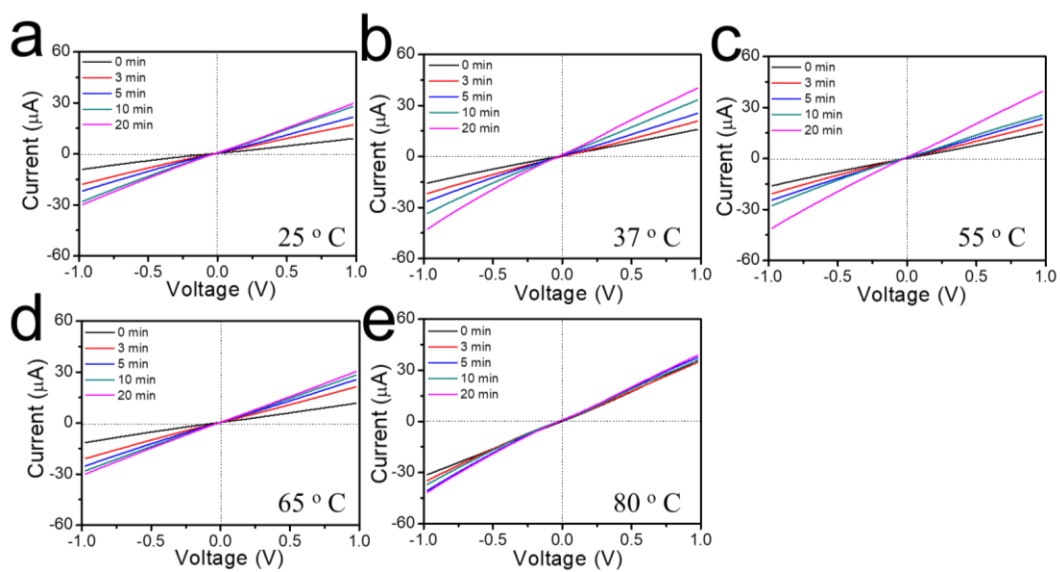

**Fig. S25** *I-V* properties of Au@hpMIL-125(CytC)/TiO<sub>2</sub>M samples with different irradiation time after storage for 21 days at room temperature. Before the ionic current measurements, the samples were first pretreated at different temperatures for 2 h: (a) 20 °C, (b) 37 °C, (c) 55 °C, (d) 65 °C, (e) 80 °C.

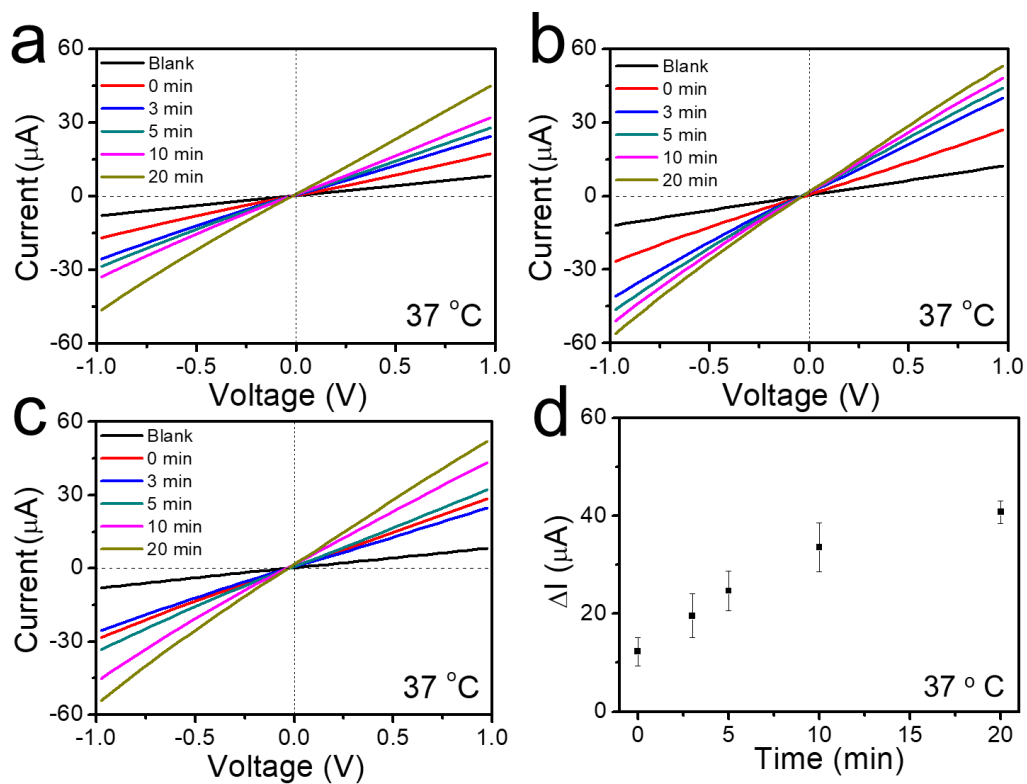

**Fig. S26** (a, b, c) Parallel *I-V* profiles of three different Au@hpMIL-125(CytC)/TiO<sub>2</sub>M samples for constructing a cascade reaction. (d) Corresponding calibration plots (the change in current at +1.0 V) of the proposed sensing device. All the samples were activated at 37 °C for 2 h.

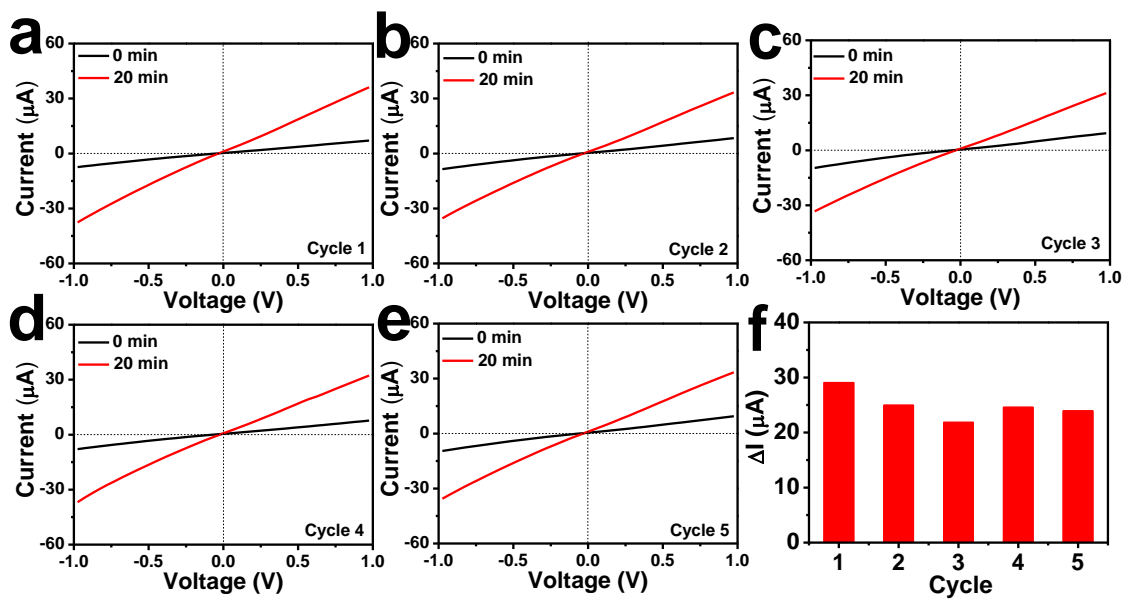

**Fig. S27.** (a-e) *I-V* properties of Au@hpMIL-125(CytC)/TiO<sub>2</sub>M at different cycles. (f)  $\Delta I$  values of Au@hpMIL-125(CytC)/TiO<sub>2</sub>M at +1.0 V before and after cascade reactions in different application cycles. The sample was activated at 55 °C for 2 h before *I-V* property measurements.

## References

- 1 G. R. Cai and H. L. Jiang, *Angew. Chem. Int. Ed.*, 2017, **56**, 563–567.
- (2) M. R. DeStefano, T. Islamoglu, S. J. Garibay, J. T. Hupp and O. K. Farha, *Chem. Mater.*, 2017, **29**, 1357–1361.
- (3) R. X. Chen, J. G. Yu and W. Xiao, *J. Mater. Chem. A*, 2013, **1**, 11682.
- (4) Z. Wang, S. G. Hu, J. Yang, A. J. Liang, Y. S. Li, Q. X. Zhuang and J. L. Gu, *Adv. Funct. Mater.*, 2018, **28**, 1707356.
- (5) L. B. Sun, J.-R. Li, J. H. Park and H.-C. Zhou, *J. Am. Chem. Soc.*, 2012, **134**, 126–129.
- (6) M. Thommes, *Chemie Ingenieur Technik*, 2010, **7**, 1059–1073.
